# Supplementary material
Source: publisher site journal article supplement (https://www.dovepress.com/article/561660)
Supplement: Supplementary file 1 [file 561660_Supplementary%20File%201%20Search%20Strategy.docx]

## SUPPLEMENTARY FILE 1: Database Search Strategy

| **Search #** | **Concept/Explanation** | **Search Terms/Strategy** |
| --- | --- | --- |
| #1 | Allied Health Assistant Terms | AHA* OR "allied health assistan*" OR "allied health profession* support workforce" OR ("allied health" OR "allied health profession*" OR health OR health?care OR "health profession*" OR clinic* OR "health service*" OR disability OR "exercise physiolog*" OR "occupational therap*" OR therap* OR rehabilitation OR physiotherap* OR "physical therap*" OR speech OR "speech therap*" OR "speech patholog*" OR "speech?language therap*" OR "speech?language patholog*" OR psycholog* OR “counsel?ing” OR “consel?or” OR "social work*" OR aged?care OR chiropract* OR diet* OR nutrition* OR "art therap*" OR " diversional therap*" OR "music therap*" OR "mental health" OR "oral health*" OR podiatr* OR chiropod* OR osteopath* OR orthot* OR prosthet* OR "community rehabilitation" OR "community health" OR imaging OR "medical imaging" OR radiograph* OR "radiation therapy" OR audiolog* OR pharmac* OR orthopt* OR interprofessional OR “multidisciplinary”) N6 (“assistan*” OR “aid*” OR “support assistan*” OR “worker” OR “helper”) |
| #2 | Workforce terms | "allied health profession*" OR "utili?ation" OR "delegat*" OR "delegation model" OR "supervis*" OR "oversight" OR "governance" OR "management" OR "profession*" OR "industry" OR "polic*" OR "health policy*" OR "health?care" OR "health service*" OR "health" OR "aged?care" OR "disability" OR "mental health" OR "health?care system*" OR "health?care policy" OR "procedur*" OR "process*" OR "standard* of practi?e" OR "practi?e standard*" OR "standard*" OR "capacity building" OR "work" OR "professional practi?e" OR "professional identity" OR "professional role" OR "professional recognition" OR "professional development" OR "educ*" OR "train*" OR "apprentice*" OR "development" OR "qualification*" OR "learning" OR "learning needs" OR "employment" OR "pre?employment" OR "pre?service" OR "knowledge" OR "teach*" OR "clinical competenc*" OR "competen*" OR "credential*" OR "practi?e guideline*" OR "requirement*" OR "regulat*" OR "scope" OR "scope of practice" OR "extended scope" OR "advanced scope" OR "advanced practi?e" OR "skill*" OR "skill* acquisition" OR "skill?mix" OR "role*" OR "role design" OR "duty" OR "duties" OR "responsibilit*" OR "clinical tasks" OR "allocation of tasks" OR "position description" OR "duty statement" OR "quality improvement*" OR "quality of care " OR "model of care" OR "framework*" OR "career" OR "recruitment" OR "retention" OR "advancement" OR "pathway" OR "classification" OR "job satisfaction" OR "confiden*" OR "satisf*" OR "organi?ation*" OR "funding" OR "leadership" OR "representation" OR "rural" OR "remote" OR "regional" OR "workplace" OR "work environment" OR "workforce" OR "workforce growth" OR "workforce redesign" OR "work redesign" OR "workforce design" OR "workforce capacity" OR "workload" OR "setting" OR "service" OR "service implementation" OR "health care delivery" OR "psychosocial factors" OR "context" OR "structural" OR "models, theoretical" OR "conceptual framework" OR "cost?benefit*" OR cost?eff* OR "productiv*" OR "remuneration" OR "resource utili?ation" OR "service planning" OR "strategic planning" OR "patient*" OR "hospital*" OR "disability sector" OR "NDIS" OR "incorporation" OR "implementation" OR "administration" OR "attitude*" OR "perspective*" OR "perception*" OR "health outcomes" OR "workforce strategy" |
| #3 | Australia | “Australia*” OR “New South Wales” OR “Victoria” OR “Queensland” OR “South Australia” OR “Western Australia” OR “Tasmania” OR “Northern Territory” OR “Australian Capital Territory” OR "Australian Capital" |
| #4 | Allied Health Workforce in Australia | TI ( (S1 AND S2 AND S3) ) OR AB ( (S1 AND S2 AND S3) )  Limiters: English, peer-reviewed, 2007 |

***Searches:***

| **Database: APA PsycINFO (through EBSCOhost)** | | | |
| --- | --- | --- | --- |
| Date of search: 10/07/2025 | | | |
| Symbols used in this document: | | | |
| “   ” finds a phrase | | | |
| Asterisk (*) = truncates stem of a word | | | |
| N6 = finds words within 6 words of each other | | | |
| ? = wildcard that finds alternate spellings of a word with no additional letter(s)  # = wildcard that finds alternate spellings of a word with additional letter(s) | | | |
| **Search #** | **Concept/Explanation** | **Search Terms/Strategy** | **# of Results** |
| #1 | Allied Health Assistant Terms | AHA* OR "allied health assistan*" OR ("allied health" OR "allied health profession*" OR health OR health?care OR "health profession*" OR clinic* OR "health service*" OR disability OR "exercise physiolog*" OR "occupational therap*" OR therap* OR rehabilitation OR physiotherap* OR "physical therap*" OR speech OR "speech therap*" OR "speech patholog*" OR "speech?language therap*" OR "speech?language patholog*" OR psycholog* OR “counsel?ing” OR “consel?or” OR "social work*" OR aged?care OR chiropract* OR diet* OR nutrition* OR "art therap*" OR " diversional therap*" OR "music therap*" OR "mental health" OR "oral health*" OR podiatr* OR chiropod* OR osteopath* OR orthot* OR prosthet* OR "community rehabilitation" OR "community health" OR imaging OR "medical imaging" OR radiograph* OR "radiation therapy" OR audiolog* OR pharmac* OR orthopt* OR interprofessional OR “multidisciplinary”) N6 (“assistan*” OR “aid*” OR “support assistan*” OR “worker” OR “helper”) | 44,094 |
| #2 | Workforce terms | "allied health profession*" OR "utili?ation" OR "deployment" OR "delegat*" OR "delegation model" OR "supervis*" OR "oversight" OR "governance" OR "management" OR "profession*" OR "industry" OR "polic*" OR "health policy*" OR "health?care" OR "health service*" OR "health" OR "aged?care" OR "disability" OR "mental health" OR "health?care system*" OR "health?care policy" OR "procedur*" OR "process*" OR "standard* of practi?e" OR "practi?e standard*" OR "standard*" OR "capacity building" OR "work" OR "professional practi?e" OR "professional identity" OR "professional role" OR "professional recognition" OR "professional development" OR "educ*" OR "train*" OR "apprentice*" OR "development" OR "qualification*" OR "learning" OR "learning needs" OR "employment" OR "pre?employment" OR "pre?service" OR "knowledge" OR "teach*" OR "clinical competenc*" OR "competen*" OR "credential*" OR "practi?e guideline*" OR "requirement*" OR "regulat*" OR "scope" OR "scope of practice" OR "extended scope" OR "advanced scope" OR "advanced practi?e" OR "skill*" OR "skill* acquisition" OR "skill?mix" OR "role*" OR "role design" OR "duty" OR "duties" OR "responsibilit*" OR "clinical tasks" OR "allocation of tasks" OR "position description" OR "duty statement" OR "quality improvement*" OR "quality of care " OR "model of care" OR "framework*" OR "career" OR "recruitment" OR "retention" OR "advancement" OR "pathway" OR "classification" OR "job satisfaction" OR "confiden*" OR "satisf*" OR "organi?ation*" OR "funding" OR "leadership" OR "representation" OR "rural" OR "remote" OR "regional" OR "workplace" OR "work environment" OR "workforce" OR "workforce growth" OR "workforce redesign" OR "work redesign" OR "workforce design" OR "workforce capacity" OR "workload" OR "setting" OR "service" OR "service implementation" OR "health care delivery" OR "psychosocial factors" OR "context" OR "structural" OR "models, theoretical" OR "conceptual framework" OR "cost?benefit*" OR cost?eff* OR "productiv*" OR "remuneration" OR "resource utili?ation" OR "service planning" OR "strategic planning" OR "patient*" OR "hospital*" OR "disability sector" OR "NDIS" OR "incorporation" OR "implementation" OR "administration" OR "attitude*" OR "perspective*" OR "perception*" OR "health outcomes" OR "workforce strategy" | 5,107,373 |
| #3 | Australia | “Australia*” OR “New South Wales” OR “Victoria” OR “Queensland” OR “South Australia” OR “Western Australia” OR “Tasmania” OR “Northern Territory” OR “Australian Capital Territory” OR "Australian Capital" | 272,613 |
| #4 | Allied Health Workforce in Australia | TI ( (S1 AND S2 AND S3) ) OR AB ( (S1 AND S2 AND S3) )  Limiters: English, Publication Date: 2007 onwards, Peer reviewed | 553 |

| **Database: CINAHL (through EBSCOhost)** | | | |
| --- | --- | --- | --- |
| Date of search: 09/07/2025 | | | |
| Symbols used in this document: | | | |
| “   ” finds a phrase | | | |
| Asterisk (*) = truncates stem of a word | | | |
| N6 = finds words within 6 words of each other | | | |
| ? = wildcard that finds alternate spellings of a word with no additional letter(s)  # = wildcard that finds alternate spellings of a word with additional letter(s) | | | |
| **Search #** | **Concept/Explanation** | **Search Terms/Strategy** | **# of Results** |
| #1 | Allied Health Assistant Terms | AHA* OR "allied health assistan*" OR "allied health profession* support workforce" OR ("allied health" OR "allied health profession*" OR health OR health?care OR "health profession*" OR clinic* OR "health service*" OR disability OR "exercise physiolog*" OR "occupational therap*" OR therap* OR rehabilitation OR physiotherap* OR "physical therap*" OR speech OR "speech therap*" OR "speech patholog*" OR "speech?language therap*" OR "speech?language patholog*" OR psycholog* OR “counsel?ing” OR “consel?or” OR "social work*" OR aged?care OR chiropract* OR diet* OR nutrition* OR "art therap*" OR " diversional therap*" OR "music therap*" OR "mental health" OR "oral health*" OR podiatr* OR chiropod* OR osteopath* OR orthot* OR prosthet* OR "community rehabilitation" OR "community health" OR imaging OR "medical imaging" OR radiograph* OR "radiation therapy" OR audiolog* OR pharmac* OR orthopt* OR interprofessional OR “multidisciplinary”) N6 (“assistan*” OR “aid*” OR “support assistan*” OR “worker” OR “helper”) | 57,485 |
| #2 | Workforce terms | "allied health profession*" OR "utili?ation" OR "deployment" OR "delegat*" OR "delegation model" OR "supervis*" OR "oversight" OR "governance" OR "management" OR "profession*" OR "industry" OR "polic*" OR "health policy*" OR "health?care" OR "health service*" OR "health" OR "aged?care" OR "disability" OR "mental health" OR "health?care system*" OR "health?care policy" OR "procedur*" OR "process*" OR "standard* of practi?e" OR "practi?e standard*" OR "standard*" OR "capacity building" OR "work" OR "professional practi?e" OR "professional identity" OR "professional role" OR "professional recognition" OR "professional development" OR "educ*" OR "train*" OR "apprentice*" OR "development" OR "qualification*" OR "learning" OR "learning needs" OR "employment" OR "pre?employment" OR "pre?service" OR "knowledge" OR "teach*" OR "clinical competenc*" OR "competen*" OR "credential*" OR "practi?e guideline*" OR "requirement*" OR "regulat*" OR "scope" OR "scope of practice" OR "extended scope" OR "advanced scope" OR "advanced practi?e" OR "skill*" OR "skill* acquisition" OR "skill?mix" OR "role*" OR "role design" OR "duty" OR "duties" OR "responsibilit*" OR "clinical tasks" OR "allocation of tasks" OR "position description" OR "duty statement" OR "quality improvement*" OR "quality of care " OR "model of care" OR "framework*" OR "career" OR "recruitment" OR "retention" OR "advancement" OR "pathway" OR "classification" OR "job satisfaction" OR "confiden*" OR "satisf*" OR "organi?ation*" OR "funding" OR "leadership" OR "representation" OR "rural" OR "remote" OR "regional" OR "workplace" OR "work environment" OR "workforce" OR "workforce growth" OR "workforce redesign" OR "work redesign" OR "workforce design" OR "workforce capacity" OR "workload" OR "setting" OR "service" OR "service implementation" OR "health care delivery" OR "psychosocial factors" OR "context" OR "structural" OR "models, theoretical" OR "conceptual framework" OR "cost?benefit*" OR cost?eff* OR "productiv*" OR "remuneration" OR "resource utili?ation" OR "service planning" OR "strategic planning" OR "patient*" OR "hospital*" OR "disability sector" OR "NDIS" OR "incorporation" OR "implementation" OR "administration" OR "attitude*" OR "perspective*" OR "perception*" OR "health outcomes" OR "workforce strategy" | 6,792,711 |
| #3 | Australia Terms | “Australia*” OR “New South Wales” OR “Victoria” OR “Queensland” OR “South Australia” OR “Western Australia” OR “Tasmania” OR “Northern Territory” OR “Australian Capital Territory” OR "Australian Capital" | 172,967 |
| #4 | Allied Health Workforce in Australia | TI ( (S1 AND S2 AND S3) ) OR AB ( (S1 AND S2 AND S3) )    Limiters - Publication Date: 20070101-20241231; Peer Reviewed  Narrow by Language: - English | 901 |

| **Database: MEDLINE (through EBSCOhost)** | | | |
| --- | --- | --- | --- |
| Date of search: 10/07/2025 | | | |
| Symbols used in this document: | | | |
| “   ” finds a phrase | | | |
| Asterisk (*) = truncates stem of a word | | | |
| N6 = finds words within 6 words of each other | | | |
| ? = wildcard that finds alternate spellings of a word with no additional letter(s)  # = wildcard that finds alternate spellings of a word with additional letter(s) | | | |
| **Search #** | **Concept/Explanation** | **Search Terms/Strategy** | **# of Results** |
| #1 | Allied Health Assistant Terms | AHA* OR "allied health assistan*" OR "allied health profession* support workforce" OR ("allied health" OR "allied health profession*" OR health OR health?care OR "health profession*" OR clinic* OR "health service*" OR disability OR "exercise physiolog*" OR "occupational therap*" OR therap* OR rehabilitation OR physiotherap* OR "physical therap*" OR speech OR "speech therap*" OR "speech patholog*" OR "speech?language therap*" OR "speech?language patholog*" OR psycholog* OR “counsel?ing” OR “consel?or” OR "social work*" OR aged?care OR chiropract* OR diet* OR nutrition* OR "art therap*" OR " diversional therap*" OR "music therap*" OR "mental health" OR "oral health*" OR podiatr* OR chiropod* OR osteopath* OR orthot* OR prosthet* OR "community rehabilitation" OR "community health" OR imaging OR "medical imaging" OR radiograph* OR "radiation therapy" OR audiolog* OR pharmac* OR orthopt* OR interprofessional OR “multidisciplinary”) N6 (“assistan*” OR “aid*” OR “support assistan*” OR “worker” OR “helper”) | 202,770 |
| #2 | Workforce terms | "allied health profession*" OR "utili?ation" OR "deployment" OR "delegat*" OR "delegation model" OR "supervis*" OR "oversight" OR "governance" OR "management" OR "profession*" OR "industry" OR "polic*" OR "health policy*" OR "health?care" OR "health service*" OR "health" OR "aged?care" OR "disability" OR "mental health" OR "health?care system*" OR "health?care policy" OR "procedur*" OR "process*" OR "standard* of practi?e" OR "practi?e standard*" OR "standard*" OR "capacity building" OR "work" OR "professional practi?e" OR "professional identity" OR "professional role" OR "professional recognition" OR "professional development" OR "educ*" OR "train*" OR "apprentice*" OR "development" OR "qualification*" OR "learning" OR "learning needs" OR "employment" OR "pre?employment" OR "pre?service" OR "knowledge" OR "teach*" OR "clinical competenc*" OR "competen*" OR "credential*" OR "practi?e guideline*" OR "requirement*" OR "regulat*" OR "scope" OR "scope of practice" OR "extended scope" OR "advanced scope" OR "advanced practi?e" OR "skill*" OR "skill* acquisition" OR "skill?mix" OR "role*" OR "role design" OR "duty" OR "duties" OR "responsibilit*" OR "clinical tasks" OR "allocation of tasks" OR "position description" OR "duty statement" OR "quality improvement*" OR "quality of care " OR "model of care" OR "framework*" OR "career" OR "recruitment" OR "retention" OR "advancement" OR "pathway" OR "classification" OR "job satisfaction" OR "confiden*" OR "satisf*" OR "organi?ation*" OR "funding" OR "leadership" OR "representation" OR "rural" OR "remote" OR "regional" OR "workplace" OR "work environment" OR "workforce" OR "workforce growth" OR "workforce redesign" OR "work redesign" OR "workforce design" OR "workforce capacity" OR "workload" OR "setting" OR "service" OR "service implementation" OR "health care delivery" OR "psychosocial factors" OR "context" OR "structural" OR "models, theoretical" OR "conceptual framework" OR "cost?benefit*" OR cost?eff* OR "productiv*" OR "remuneration" OR "resource utili?ation" OR "service planning" OR "strategic planning" OR "patient*" OR "hospital*" OR "disability sector" OR "NDIS" OR "incorporation" OR "implementation" OR "administration" OR "attitude*" OR "perspective*" OR "perception*" OR "health outcomes" OR "workforce strategy" | 28,872,555 |
| #3 | Australia | “Australia*” OR “New South Wales” OR “Victoria” OR “Queensland” OR “South Australia” OR “Western Australia” OR “Tasmania” OR “Northern Territory” OR “Australian Capital Territory” OR "Australian Capital" | 1,100,703 |
| #4 | Allied Health Workforce in Australia | TI ( (S1 AND S2 AND S3) ) OR AB ( (S1 AND S2 AND S3) )  Limiters: Peer-reviewed, English language, published after 2007  Geography:  Narrow by Subject Geographic:  - Tasmania  - Australian capital territory  - northern territory  - south Australia  - western Australia  - Victoria  - Queensland  - new south Wales  - Australia | 750 |

| **Database: SCOPUS** | | | |
| --- | --- | --- | --- |
| Date of search: 10/07/2025 | | | |
| Symbols used in this document: | | | |
| “   ” finds a phrase | | | |
| Asterisk (*) = truncates stem of a word | | | |
| W/6 = finds words within 6 words of each other | | | |
| ? = wildcard that finds alternate spellings of a word  * = wildcard finds alternate spellings of a word with additional letter(s) | | | |
| **Search #** | **Concept/Explanation** | **Search Terms/Strategy** | **# of Results** |
| #1 | Allied Health Assistant Terms | TITLE-ABS ( AHA* OR "allied health assistan*" OR "allied health profession* support workforce" OR ( "allied health" OR "allied health profession*" OR health OR health?care OR "health profession*" OR clinic* OR "health service*" OR disability OR "exercise physiolog*" OR "occupational therap*" OR therap* OR rehabilitation OR physiotherap* OR "physical therap*" OR speech OR "speech therap*" OR "speech patholog*" OR "speech?language therap*" OR "speech?language patholog*" OR psycholog* OR "counsel?ing" OR "consel?or" OR "social work*" OR aged?care OR chiropract* OR diet* OR nutrition* OR "art therap*" OR " diversional therap*" OR "music therap*" OR "mental health" OR "oral health*" OR podiatr* OR chiropod* OR osteopath* OR orthot* OR prosthet* OR "community rehabilitation" OR "community health" OR imaging OR "medical imaging" OR radiograph* OR "radiation therapy" OR audiolog* OR pharmac* OR orthopt* OR interprofessional OR "multidisciplinary") W/6 ( "assistan*" OR "aid*" OR "support assistan*" OR "worker" OR "helper" ) ) | 292,017 |
| #2 | Workforce terms | TITLE-ABS ("allied health profession*" OR "utili?ation" OR “deployment” OR "delegat*" OR "delegation model" OR "supervis*" OR "oversight" OR "governance" OR "management" OR "profession*" OR "industry" OR "polic*" OR "health policy*" OR "health?care" OR "health service*" OR "health" OR "aged?care" OR "disability" OR "mental health" OR "health?care system*" OR "health?care policy" OR "procedur*" OR "process*" OR "standard* of practi?e" OR "practi?e standard*" OR "standard*" OR "capacity building" OR "work" OR "professional practi?e" OR "professional identity" OR "professional role" OR "professional recognition" OR "professional development" OR "educ*" OR "train*" OR "apprentice*" OR "development" OR "qualification*" OR "learning" OR "learning needs" OR "employment" OR "pre?employment" OR "pre?service" OR "knowledge" OR "teach*" OR "clinical competenc*" OR "competen*" OR "credential*" OR "practi?e guideline*" OR "requirement*" OR "regulat*" OR "scope" OR "scope of practice" OR "extended scope" OR "advanced scope" OR "advanced practi?e" OR "skill*" OR "skill* acquisition" OR "skill?mix" OR "role*" OR "role design" OR "duty" OR "duties" OR "responsibilit*" OR "clinical tasks" OR "allocation of tasks" OR "position description" OR "duty statement" OR "quality improvement*" OR "quality of care " OR "model of care" OR "framework*" OR "career" OR "recruitment" OR "retention" OR "advancement" OR "pathway" OR "classification" OR "job satisfaction" OR "confiden*" OR "satisf*" OR "organi?ation*" OR "funding" OR "leadership" OR "representation" OR "rural" OR "remote" OR "regional" OR "workplace" OR "work environment" OR "workforce" OR "workforce growth" OR "workforce redesign" OR "work redesign" OR "workforce design" OR "workforce capacity" OR "workload" OR "setting" OR "service" OR "service implementation" OR "health care delivery" OR "psychosocial factors" OR "context" OR "structural" OR "models, theoretical" OR "conceptual framework" OR "cost?benefit*" OR cost?eff* OR "productiv*" OR "remuneration" OR "resource utili?ation" OR "service planning" OR "strategic planning" OR "patient*" OR "hospital*" OR "disability sector" OR "NDIS" OR "incorporation" OR "implementation" OR "administration" OR "attitude*" OR "perspective*" OR "perception*" OR "health outcomes" OR "workforce strategy") | 58,859,542 |
| #3 | Australia | TITLE-ABS ( "australia*" OR "new south wales" OR "victoria" OR "queensland" OR "south australia" OR "western australia" OR "tasmania" OR "northern territory" OR "australian capital territory" OR "australian capital" ) | 648,324 |
| #4 | AHA workforce in Australia | #1 AND #2 AND #3  Limiters: Publication year 2007 AND  English language  AFFILCOUNTRY: Australia  Doc type: Article or Reviews  Source type: Journal  Publication stage: Final | 3539 |

| **Database: Web of science core collection** | | | |
| --- | --- | --- | --- |
| Date of search: 10/07/2025 | | | |
| Symbols used in this document: | | | |
| “   ” finds a phrase | | | |
| Asterisk (*) = truncates stem of a word | | | |
| NEAR/6 = finds words within 6 words of each other | | | |
| ? = wildcard that finds alternate spellings of a word with no additional letter(s)  * = wildcard that finds alternate spelling of a word with additional letter(s) | | | |
| **Search #** | **Concept/Explanation** | **Search Terms/Strategy** | **# of Results** |
| #1 | Allied Health Assistant Terms | TS=(AHA* OR "allied health assistan*" OR "allied health profession* support workforce" OR ("allied health" OR "allied health profession*" OR health OR health?care OR "health profession*" OR clinic* OR "health service*" OR disability OR "exercise physiolog*" OR "occupational therap*" OR therap* OR rehabilitation OR physiotherap* OR "physical therap*" OR speech OR "speech therap*" OR "speech patholog*" OR "speech?language therap*" OR "speech?language patholog*" OR psycholog* OR "counsel?ing" OR "consel?or" OR "social work*" OR aged?care OR chiropract* OR diet* OR nutrition* OR "art therap*" OR " diversional therap*" OR "music therap*" OR "mental health" OR "oral health*" OR podiatr* OR chiropod* OR osteopath* OR orthot* OR prosthet* OR "community rehabilitation" OR "community health" OR imaging OR "medical imaging" OR radiograph* OR "radiation therapy" OR audiolog* OR pharmac* OR orthopt* OR interprofessional OR "multidisciplinary") NEAR/6 ("assistan*" OR "aid*" OR "support assistan*" OR "worker" OR "helper")) | 149,401 |
| #2 | Workforce terms | TS=("allied health profession*" OR "utili?ation" OR "deployment" OR "delegat*" OR "delegation model" OR "supervis*" OR "oversight" OR "governance" OR "management" OR "profession*" OR "industry" OR "polic*" OR "health policy*" OR "health?care" OR "health service*" OR "health" OR "aged?care" OR "disability" OR "mental health" OR "health?care system*" OR "health?care policy" OR "procedur*" OR "process*" OR "standard* of practi?e" OR "practi?e standard*" OR "standard*" OR "capacity building" OR "work" OR "professional practi?e" OR "professional identity" OR "professional role" OR "professional recognition" OR "professional development" OR "educ*" OR "train*" OR "apprentice*" OR "development" OR "qualification*" OR "learning" OR "learning needs" OR "employment" OR "pre?employment" OR "pre?service" OR "knowledge" OR "teach*" OR "clinical competenc*" OR "competen*" OR "credential*" OR "practi?e guideline*" OR "requirement*" OR "regulat*" OR "scope" OR "scope of practice" OR "extended scope" OR "advanced scope" OR "advanced practi?e" OR "skill*" OR "skill* acquisition" OR "skill?mix" OR "role*" OR "role design" OR "duty" OR "duties" OR "responsibilit*" OR "clinical tasks" OR "allocation of tasks" OR "position description" OR "duty statement" OR "quality improvement*" OR "quality of care " OR "model of care" OR "framework*" OR "career" OR "recruitment" OR "retention" OR "advancement" OR "pathway" OR "classification" OR "job satisfaction" OR "confiden*" OR "satisf*" OR "organi?ation*" OR "funding" OR "leadership" OR "representation" OR "rural" OR "remote" OR "regional" OR "workplace" OR "work environment" OR "workforce" OR "workforce growth" OR "workforce redesign" OR "work redesign" OR "workforce design" OR "workforce capacity" OR "workload" OR "setting" OR "service" OR "service implementation" OR "health care delivery" OR "psychosocial factors" OR "context" OR "structural" OR "models, theoretical" OR "conceptual framework" OR "cost?benefit*" OR cost?eff* OR "productiv*" OR "remuneration" OR "resource utili?ation" OR "service planning" OR "strategic planning" OR "patient*" OR "hospital*" OR "disability sector" OR "NDIS" OR "incorporation" OR "implementation" OR "administration" OR "attitude*" OR "perspective*" OR "perception*" OR "health outcomes" OR "workforce strategy") | 44,053,669 |
| #3 | Australia | TS=(“Australia*” OR “New South Wales” OR “Victoria” OR “Queensland” OR “South Australia” OR “Western Australia” OR “Tasmania” OR “Northern Territory” OR “Australian Capital Territory” OR "Australian Capital") | [510,447](https://www.webofscience.com/wos/woscc/summary/bdf826b5-81e9-458e-837f-f9e1197df59f-016d6940b9/relevance/1) |
| #4 | AHA workforce in Australia | (#1 AND #2 AND #3)  Limiters: Published after 2007-01-01  (CU==("AUSTRALIA")) and English (Languages)  **2007** (Publication Years) and **English** (Languages) and **AUSTRALIA** (Countries/Regions) and **Article** or **Review Article** (Document Types) | 1342 |

| **Database: Cochrane Central Register of Controlled Trials** | | | |
| --- | --- | --- | --- |
| Date of search: 10/07/2025 | | | |
| Symbols used in this document: | | | |
| “   ” finds a phrase | | | |
| Asterisk (*) = truncates stem of a word | | | |
| NEAR/6 = finds words within 6 words of each other | | | |
| * = wildcard that finds alternate spellings of a word with no additional letter(s)  ? = wildcard that finds alternate spellings of a word with additional letter(s) | | | |
| **Search #** | **Concept/Explanation** | **Search Terms/Strategy** | **# of Results** |
| #1 |  | (AHA* OR ("allied health" NEXT assistan*) OR ("allied health" NEXT profession* NEXT "support workforce") OR ("allied health" OR ("allied health" NEXT profession*) OR health OR health?care OR ("health" NEXT profession*) OR clinic* OR ("health" NEXT service*) OR disability OR ("exercise" NEXT physiolog*) OR ("occupational" NEXT therap*) OR therap* OR rehabilitation OR physiotherap* OR ("physical" NEXT therap*) OR speech OR ("speech" NEXT therap*) OR ("speech" NEXT patholog*) OR (speech?language NEXT therap*) OR (speech?language NEXT patholog*) OR psycholog* OR counsel?ing OR consel?or OR ("social" NEXT work*) OR aged?care OR chiropract* OR diet* OR nutrition* OR ("art" NEXT therap*) OR (" diversional" NEXT therap*) OR ("music" NEXT therap*) OR "mental health" OR ("oral" NEXT health*) OR podiatr* OR chiropod* OR osteopath* OR orthot* OR prosthet* OR "community rehabilitation" OR "community health" OR imaging OR "medical imaging" OR radiograph* OR "radiation therapy" OR audiolog* OR pharmac* OR orthopt* OR interprofessional OR multidisciplinary ) NEAR/6(assistan* OR aid* OR ("support" NEXT assistan*) OR worker OR helper )):ti,ab | 1,399,706 |
| #2 |  | MeSH descriptor: [Allied Health Occupations] explode all trees | 1493 |
| #3 |  | MeSH descriptor: [Allied Health Personnel] explode all trees | 1826 |
| #4 |  | ((("allied health" NEXT profession*) OR utili?ation OR “deployment” OR delegat* OR "delegation model" OR supervis* OR oversight OR governance OR management OR profession* OR industry OR polic* OR ("health" NEXT policy*) OR health?care OR ("health" NEXT service*) OR health OR aged?care OR disability OR "mental health" OR (health?care NEXT system*) OR (health?care NEXT "policy") OR procedur* OR process* OR (standard* NEXT "of" NEXT practi?e) OR (practi?e NEXT standard*) OR standard* OR "capacity building" OR work OR ("professional" NEXT practi?e) OR "professional identity" OR "professional role" OR "professional recognition" OR "professional development" OR educ* OR train* OR apprentice* OR development OR qualification* OR learning OR "learning needs" OR employment OR pre?employment OR pre?service OR knowledge OR teach* OR ("clinical" NEXT competenc*) OR competen* OR credential* OR (practi?e NEXT guideline*) OR requirement* OR regulat* OR scope OR "scope of practice" OR "extended scope" OR "advanced scope" OR ("advanced" NEXT practi?e) OR skill* OR (skill* NEXT "acquisition") OR skill?mix OR role* OR "role design" OR duty OR duties OR responsibilit* OR "clinical tasks" OR "allocation of tasks" OR "position description" OR "duty statement" OR ("quality" NEXT improvement*) OR "quality of care" OR "model of care" OR framework* OR career OR recruitment OR retention OR advancement OR pathway OR classification OR "job satisfaction" OR confiden* OR satisf* OR organi?ation* OR funding OR leadership OR representation OR rural OR remote OR regional OR workplace OR "work environment" OR workforce OR "workforce growth" OR "workforce redesign" OR "work redesign" OR "workforce design" OR "workforce capacity" OR workload OR setting OR service OR "service implementation" OR "health care delivery" OR "psychosocial factors" OR context OR structural OR "models, theoretical" OR "conceptual framework" OR cost?benefit* OR cost?eff* OR productiv* OR remuneration OR ("resource" NEXT utili?ation) OR "service planning" OR "strategic planning" OR patient* OR hospital* OR "disability sector" OR NDIS OR incorporation OR implementation OR administration OR attitude* OR perspective* OR perception* OR "health outcomes" OR "workforce strategy"):ti,ab) | 1,798,474 |
| #5 |  | ((Australia* OR "New South Wales" OR Victoria OR Queensland OR "South Australia" OR "Western Australia" OR Tasmania OR "Northern Territory" OR "Australian Capital Territory" OR "Australian Capital"):ti,ab) | 22,120 |
| #6 |  | MeSH descriptor: [Australia] explode all trees | 7360 |
|  |  | #1 AND (#2 OR #3) AND #4 AND #5 AND #6  Limiters: English, peer reviewed  Published: 2007 onwards | 54 |

| **Database: ProQuest** | | | |
| --- | --- | --- | --- |
| Date of search: 10/07/2025 | | | |
| Symbols used in this document: | | | |
| “   ” finds a phrase | | | |
| Asterisk (*) = truncates stem of a word | | | |
| NEAR/6 = finds words within 6 words of each other | | | |
| * = wildcard that finds alternate spellings of a word with no additional letter(s)  ? = wildcard that finds alternate spellings of a word with additional letter(s) | | | |
| **Search #** | **Concept/Explanation** | **Search Terms/Strategy** | **# of Results** |
| #1 |  | AHA* OR "allied health assistan*" OR "allied health profession* support workforce" OR ("allied health" OR "allied health profession*" OR health OR health?care OR "health profession*" OR clinic* OR "health service*" OR disability OR "exercise physiolog*" OR "occupational therap*" OR therap* OR rehabilitation OR physiotherap* OR "physical therap*" OR speech OR "speech therap*" OR "speech patholog*" OR "speech?language therap*" OR "speech?language patholog*" OR psycholog* OR counsel?ing OR consel?or OR "social work*" OR aged?care OR chiropract* OR diet* OR nutrition* OR "art therap*" OR " diversional therap*" OR "music therap*" OR "mental health" OR "oral health*" OR podiatr* OR chiropod* OR osteopath* OR orthot* OR prosthet* OR "community rehabilitation" OR "community health" OR imaging OR "medical imaging" OR radiograph* OR "radiation therapy" OR audiolog* OR pharmac* OR orthopt* OR interprofessional OR multidisciplinary ) NEAR/6 (assistan* OR aid* OR "support assistan*" OR worker OR helper ) | 8,572,382 |
| #2 |  | "allied health profession*" OR utili?ation OR deployment OR delegat* OR "delegation model" OR supervis* OR oversight OR governance OR management OR profession* OR industry OR polic* OR ("health policy") OR health?care OR ("health service" OR "health services") OR health OR aged?care OR disability OR "mental health" OR "health?care system*" OR "health?care policy" OR procedur* OR process* OR "standard* of practi?e" OR "practi?e standard*" OR standard* OR "capacity building" OR work OR "professional practi?e" OR "professional identity" OR "professional role" OR "professional recognition" OR "professional development" OR educ* OR train* OR apprentice* OR development OR qualification* OR learning OR "learning needs" OR employment OR pre?employment OR pre?service OR knowledge OR teach* OR ("clinical competence") OR competen* OR credential* OR "practi?e guideline*" OR requirement* OR regulat* OR scope OR "scope of practice" OR "extended scope" OR "advanced scope" OR "advanced practi?e" OR skill* OR "skill* acquisition" OR skill?mix OR role* OR "role design" OR duty OR duties OR responsibilit* OR "clinical tasks" OR "allocation of tasks" OR "position description" OR "duty statement" OR ("quality improvement" OR "quality improvements") OR "quality of care" OR "model of care" OR framework* OR career OR recruitment OR retention OR advancement OR pathway OR classification OR "job satisfaction" OR confiden* OR satisf* OR organi?ation* OR funding OR leadership OR representation OR rural OR remote OR regional OR workplace OR "work environment" OR workforce OR "workforce growth" OR "workforce redesign" OR "work redesign" OR "workforce design" OR "workforce capacity" OR workload OR setting OR service OR "service implementation" OR "health care delivery" OR "psychosocial factors" OR context OR structural OR "models, theoretical" OR "conceptual framework" OR cost?benefit* OR cost?eff* OR productiv* OR remuneration OR "resource utili?ation" OR "service planning" OR "strategic planning" OR patient* OR hospital* OR "disability sector" OR NDIS OR incorporation OR implementation OR administration OR attitude* OR perspective* OR perception* OR "health outcomes" OR "workforce strategy" | 76,811,875 |
| #3 |  | Australia* OR "New South Wales" OR Victoria OR Queensland OR "South Australia" OR "Western Australia" OR Tasmania OR "Northern Territory" OR "Australian Capital Territory" OR "Australian Capital" | 77,514,175 |
| #4 |  | #1 AND #2 AND #3  ?Limit to dissertations and theses | 0 |

| **Database: Trove** | | | |
| --- | --- | --- | --- |
| Date of search: 10/07/2025 | | | |
| Symbols used in this document: | | | |
| “   ” finds a phrase | | | |
| Asterisk (*) = truncates stem of a word | | | |
| NEAR/6 = finds words within 6 words of each other | | | |
| * = wildcard that finds alternate spellings of a word with no additional letter(s)  ? = wildcard that finds alternate spellings of a word with additional letter(s) | | | |
| **Search #** | **Concept/Explanation** | **Search Terms/Strategy** | **# of Results** |
| #1 | Allied Health Assistant workforce in Australia | Keyword: (Allied health assistan*) OR (Aallied health assistan*) OR (dietitian assistan*) OR (occupational therapy assistan*) OR (physiotherapy assistan*) OR (speech* assistan*) OR (rehabilitation assistan*) OR (pharmac* assistan*) OR (health assistan*) OR (mental health assistan*) OR (diversional therapy assistan*) OR (music therapy assistan*) OR (pharmac* assistan*) OR (podiatr* assistan*)  Subject: (Allied health assistan*) OR (assistan*) Language: English Year range from: 2007  **Limiters**: Format: Thesis  Australian content | 62 |

SUPPLEMENTARY FILE 2: Google Advanced Search

**STEP 1:**

Main search term “allied health assistant”

Regions= Australia

Language = English

Date restriction= 2007-2024

*This search primarily identified job openings*

**STEP 2:**

Repeated the search with each of the following:

- Health.gov.au ;
- health.nsw.gov.au;
- act.gov.au/health;
- www.health.qld.gov.au;
- health.vic.gov.au;
- vichealth.vic.gov.au;
- health.tas.gov.au;
- health.wa.gov.au;
- health.nt.gov.au

EXCLUSIONS:

- data only (e.g. price ranges for a service)
- information about awards/ employment terms and conditions
- job advertisement

**Results (number of documents)**

1. Health.gov.au (3)
2. health.nsw.gov.au (2)
3. act.gov.au (0)
4. health.qld.gov.au (5)
5. health.vic.gov.au (5)
6. vichealth.vic.gov.au (0)
7. health.tas.gov.au (0)
8. health.wa.gov.au (2)
9. health.nt.gov.au (0)
10. other (1)

NOTE: if AHA not in title of document, did word search before including the document.
